# Supplementary material for: Two novel octamolybdate nanoclusters as catalysts for dye degradation by air under room conditions
Source: Royal Society of Chemistry journal article supplement (doi:10.1039/c4dt03377a), 2015-01-01
Supplement: c4dt03377a1.pdf [file c4dt03377a1.pdf]

## **Two novel octamolybdate nanoclusters as catalysts for dye degradation by air under room conditions**

**Mahnaz Najafi<sup>a</sup>, Alireza Abbasi<sup>a,\*</sup>, Majid Masteri-Farahani<sup>b</sup> and Jan Janczak<sup>c</sup>**

<sup>a</sup>) School of Chemistry, College of Science, University of Tehran, Tehran, Iran

<sup>b</sup>) Faculty of Chemistry, Kharazmi University, Tehran, Iran

<sup>c</sup>) Institute of Low Temperature and Structure Research, Polish Academy of Sciences, PO Box 1410,  
50-950 Wrocław, Poland.

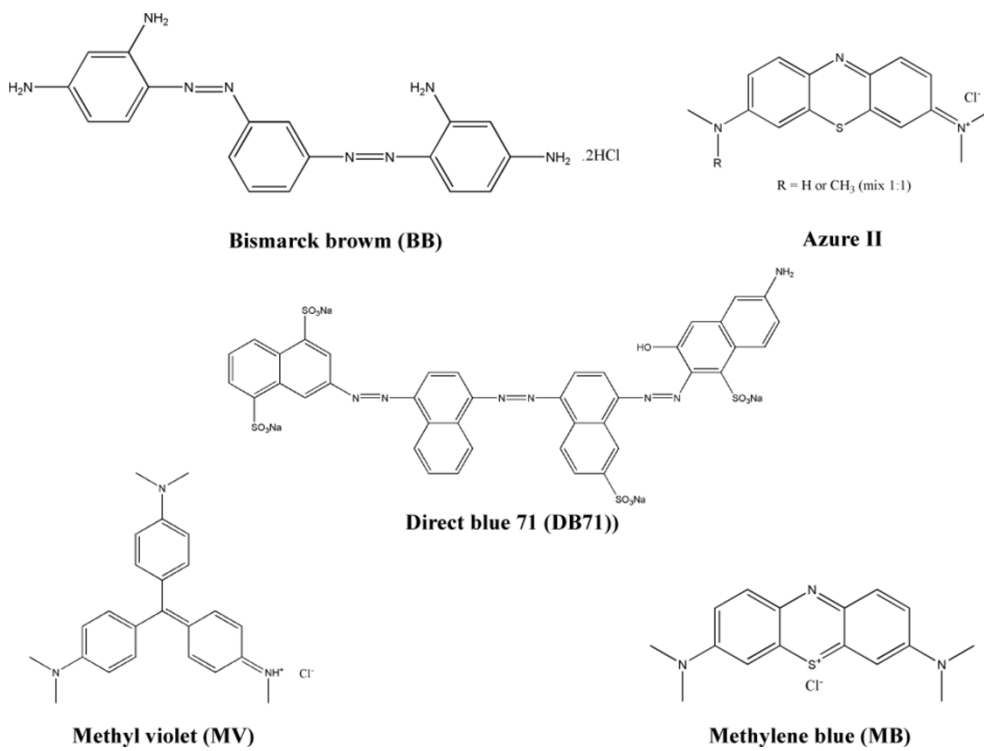

**Fig. S1.** Structure of the investigated dyes.

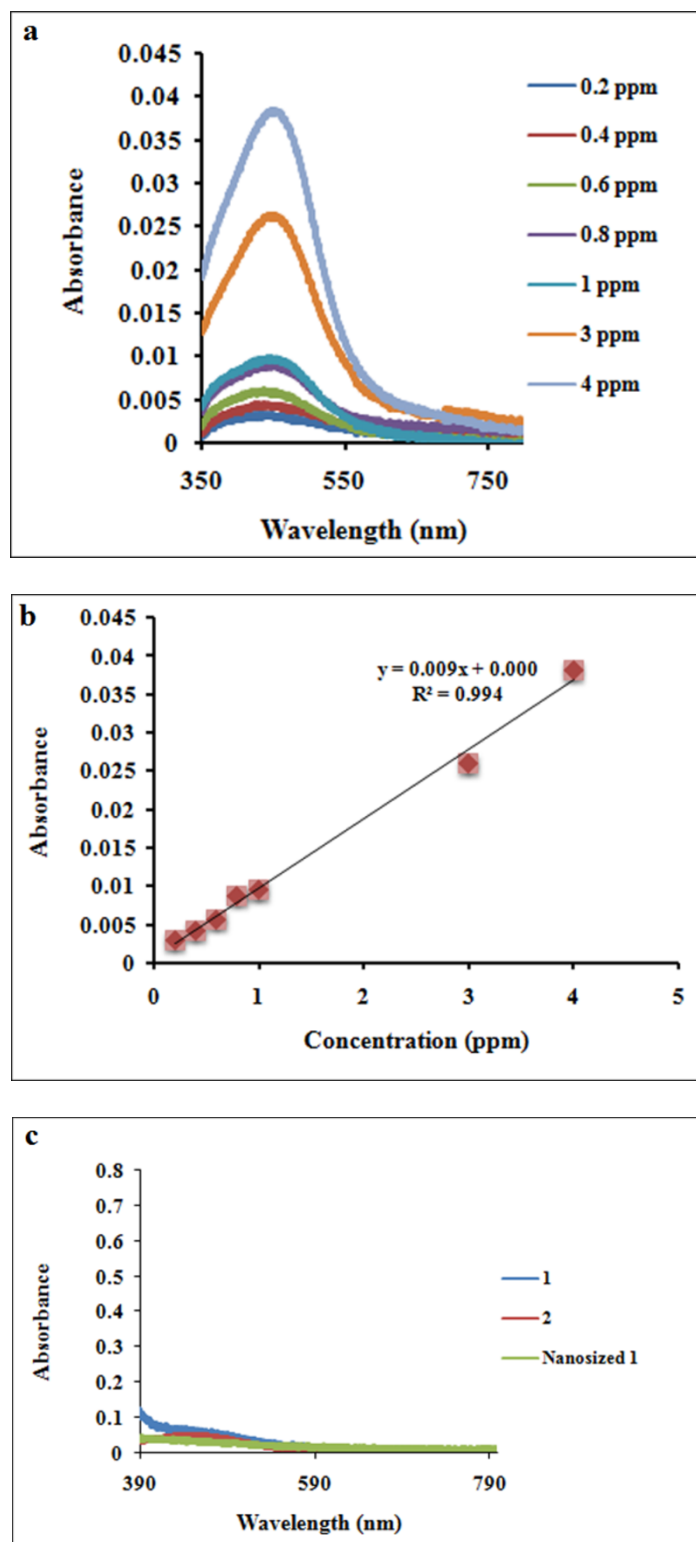

**Fig. S2.** (a) UV-Vis spectra for the standard solutions of Bismarck brown (BB), (b) calibration curve (c) decomposition of BB ( $C_0 = 0.3$  g/L, 100 ml) in the presence of the catalysts (1.33 g) after 2 h.

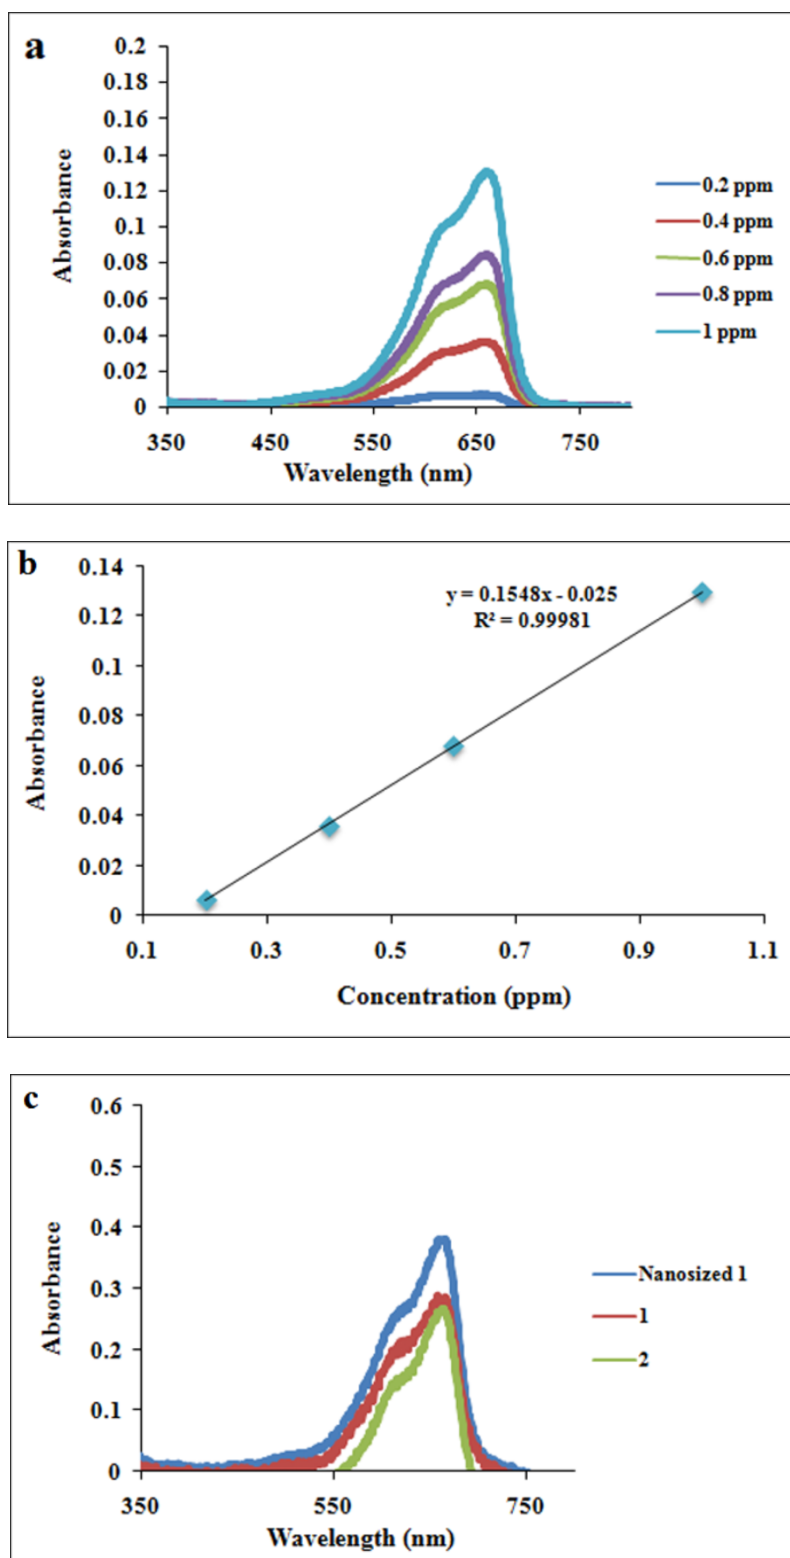

**Fig. S3.** (a) UV-Vis spectra for the standard solutions of Azure II, (b) calibration curve (c) decomposition of the dye ( $C_0 = 0.3$  g/L, 100 ml) in the presence of the catalysts (1.33 g) after 2 h.

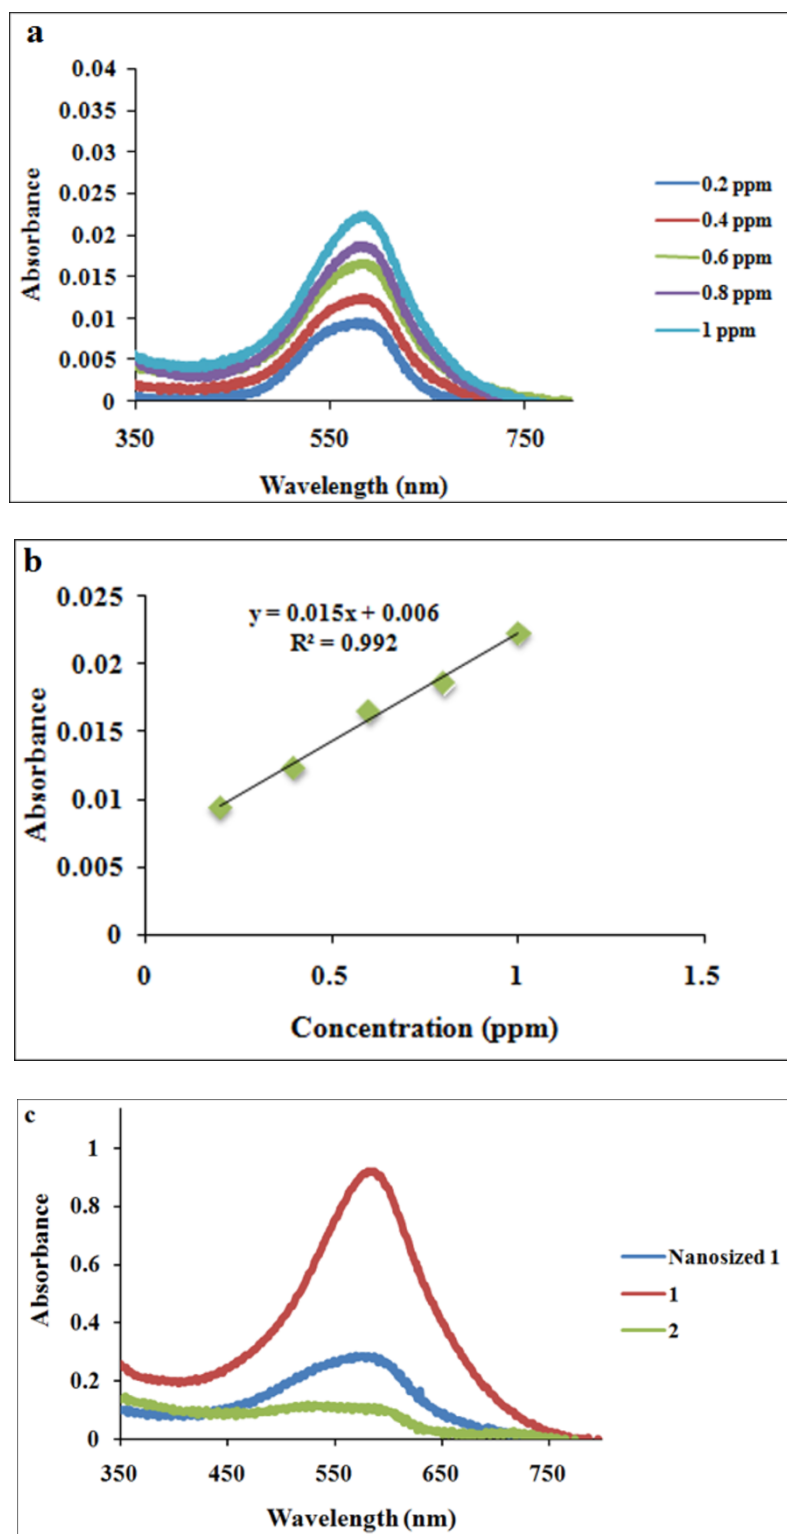

**Fig. S4.** (a) UV-Vis spectra for the standard solutions of Direct blue 71 (DB 71), (b) calibration curve (c) decomposition of DB 71 ( $C_0 = 0.3$  g/L, 100 ml) in the presence of the catalysts (1.33 g) after 2 h.

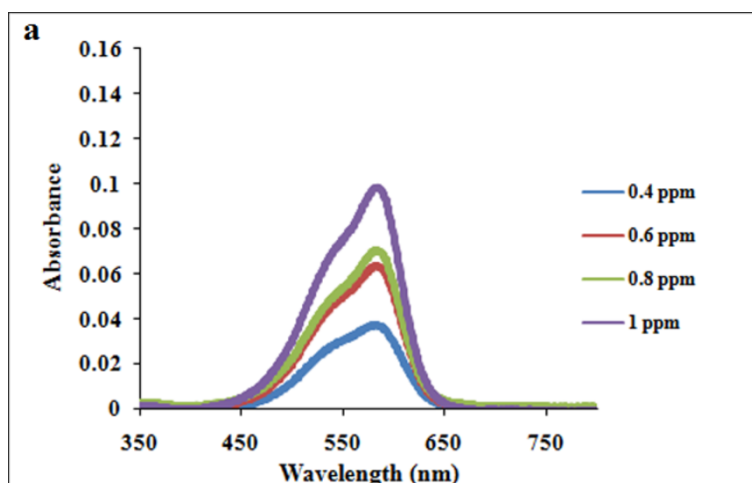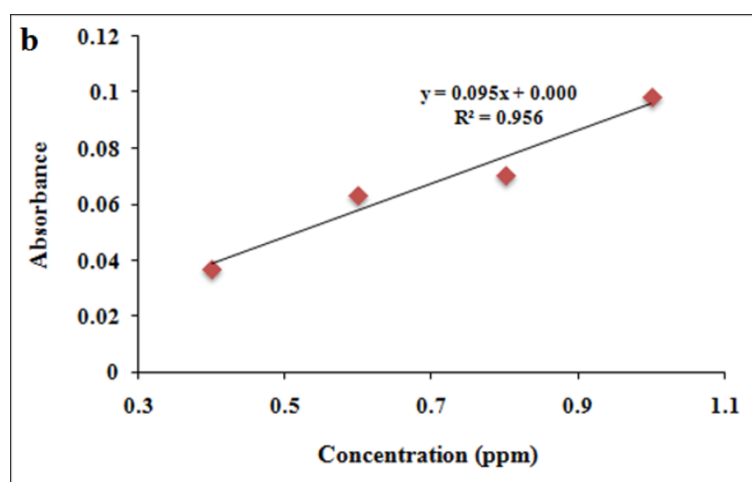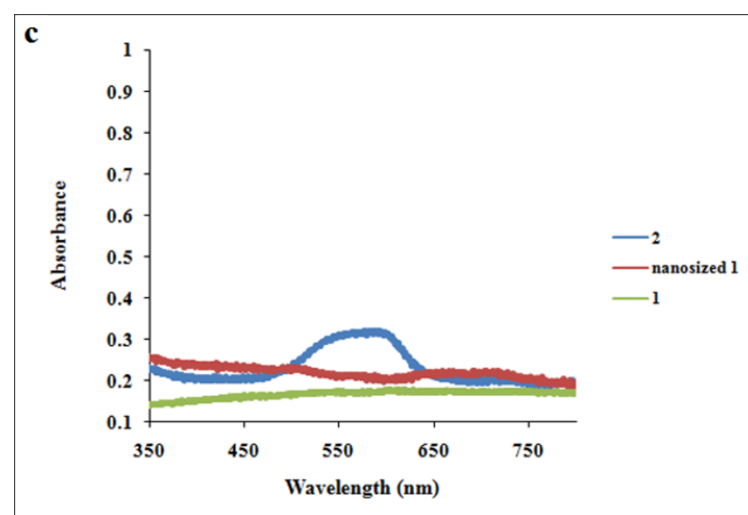

**Fig. S5.** (a) UV-Vis spectra for the standard solutions of Methyl violet (MV), (b) calibration curve (c) decomposition of MV ( $C_0 = 0.3$  g/L, 100 ml) in the presence of the catalysts (1.33 g) after 2 h.

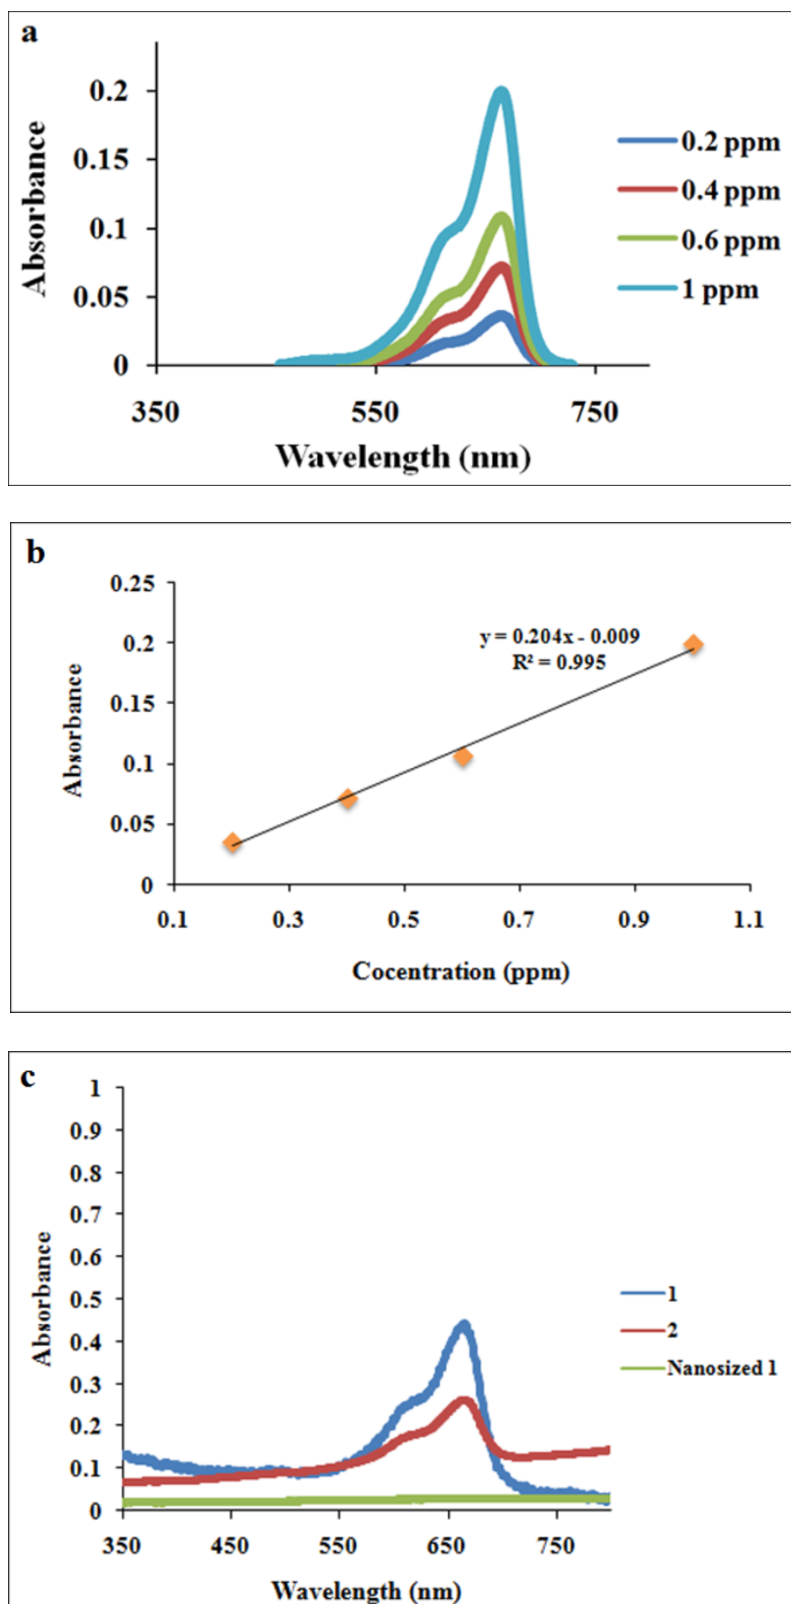

**Fig. S6.** (a) UV-Vis spectra for the standard solutions of Methylene blue (MB), (b) calibration curve (c) decomposition of MB ( $C_0 = 0.3$  g/L, 100 ml) in the presence of the catalysts (1.33 g) after 2 h.

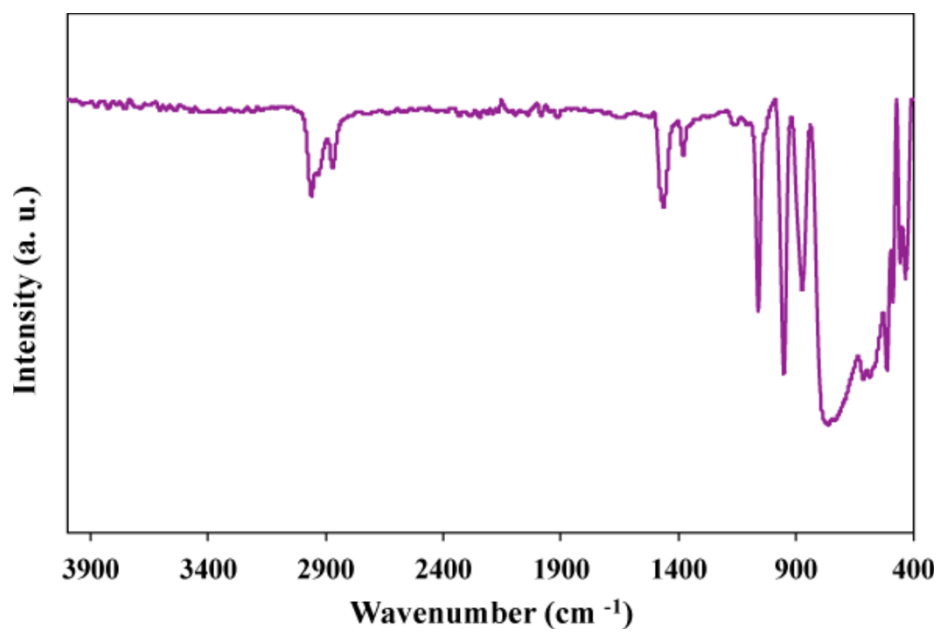

**Fig. S7.** FT-IR spectrum of tetrabutylammonium octamolybdate.



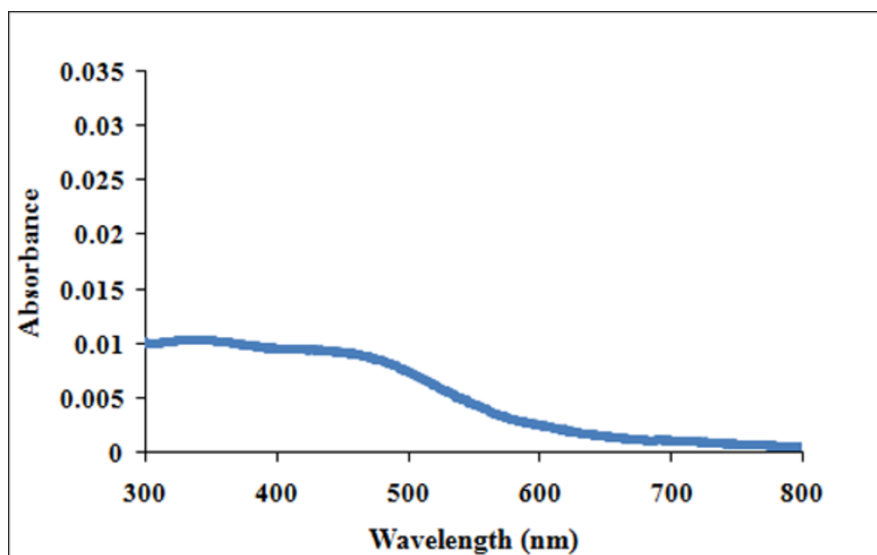

**Fig. S8.** The UV-Vis spectrum of BB solution in the presence of tetrabutylammonium octamolybdate after 2 h.

a.

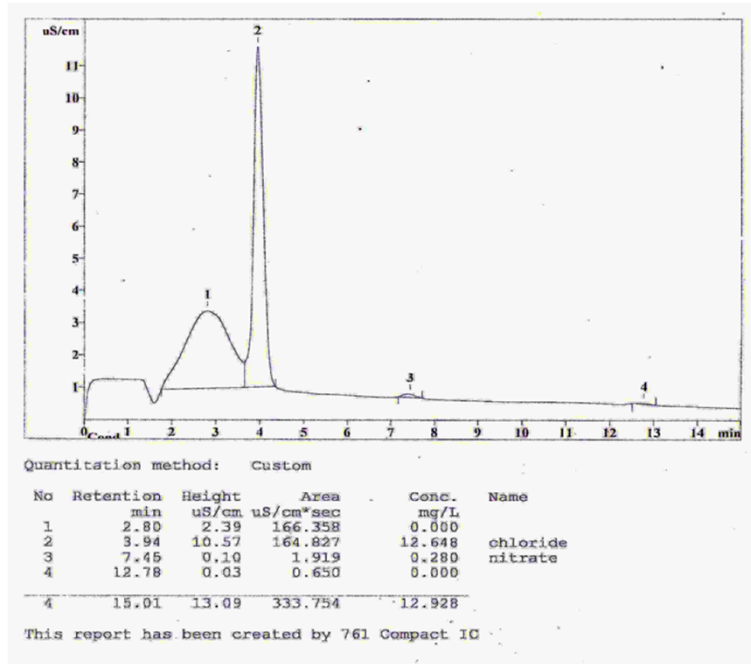

b.

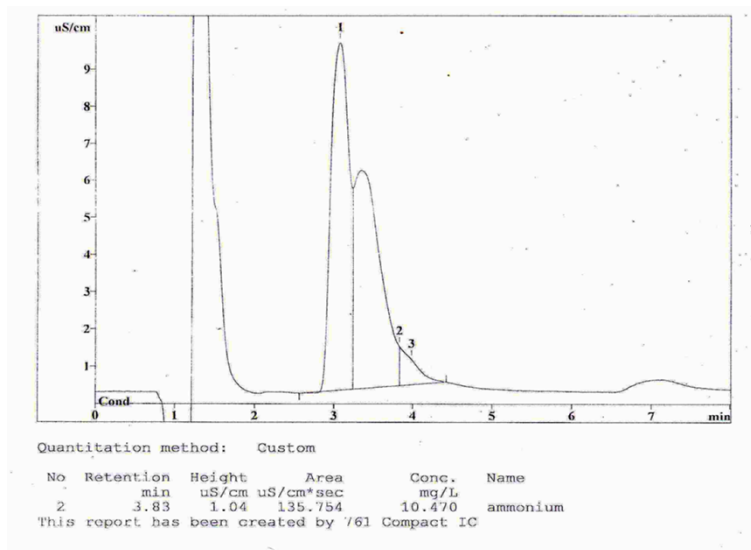

**Fig. S9.** The ion chromatograms for BB solution for detected a. anions and b. cation in the treated sample after 2h.
